# Supplementary material
Source: publisher site journal article supplement (https://www.dovepress.com/get_supplementary_file.php?f=353523.docx)
Supplement: Supplementary file 1 [file get_supplementary_file.php]

**Supplementary Appendix**

**Table S1** Multivariable Cox regression analysis of the prognosis factors associated with MACSS in patients with ST≥5Y diagnosed after 2010

| **Parameters** | **MACSS** | |
| --- | --- | --- |
| **HR (95% CI)** | **P value** |
| **Age** | 1.022 (1.009, 1.036) | 0.001 |
| **Race** |  |  |
| White | Reference |  |
| Black | 1.933 (1.222, 3.057) | 0.005 |
| Others | 1.356 (0.741, 2.479) | 0.323 |
| **Marital status** |  |  |
| Unmarried | Reference |  |
| Married | 1.165 (0.813, 1.670) | 0.405 |
| Unknown | 1.374 (0.618, 3.054) | 0.436 |
| **Tumor location** |  |  |
| Right colon | Reference |  |
| Left colon | 1.736 (1.190, 2.532) | 0.004 |
| Rectum | 1.358 (0.634, 2.909) | 0.431 |
| **T stage** |  |  |
| T0/Tis/T1 | Reference |  |
| T2 | 1.893 (0.406, 8.824) | 0.417 |
| T3 | 3.167 (0.764, 13.119) | 0.112 |
| T4 | 4.247 (0.996, 18.107) | 0.051 |
| Unknown | 6.425 (0.784, 52.681) | 0.083 |
| **N stage** |  |  |
| N0 | Reference |  |
| N1 | 1.326 (0.859, 2.047) | 0.203 |
| N2 | 1.366 (0.842, 2.217) | 0.207 |
| Unknown | 0.669 (0.042, 10.662) | 0.776 |
| **Metastasis** |  |  |
| M0 | Reference |  |
| M1 | 2.939 (1.523, 5.669) | 0.001 |
| **Pretreatment CEA level** | |  |
| Negative/Borderline | Reference |  |
| Positive | 1.990 (1.320, 2.998) | 0.001 |
| Unknown | 1.065 (0.684, 1.657) | 0.781 |
| **Surgery of primary site** | |  |
| No | Reference |  |
| Yes | 0.590 (0.043, 8.065) | 0.692 |
| **Dissection of regional lymph nodes** | |  |
| None or biopsy | Reference |  |
| Yes | 1.059 (0.272, 4.123) | 0.935 |
| Unknown | 3.226 (0.203, 51.225) | 0.406 |
| **Radiotherapy** |  |  |
| None | Reference |  |
| Preoperative RT | 1.132 (0.495, 2.585) | 0.769 |
| Postoperative RT | 1.368 (0.698, 2.684) | 0.361 |
| **Chemotherapy** |  |  |
| No/Unknown | Reference |  |
| Yes | 2.125 (0.187, 24.091) | 0.543 |
| **Systemic therapy** |  |  |
| No | Reference |  |
| Yes | 0.597 (0.052, 6.880) | 0.679 |
| **Tumor deposits** |  |  |
| Negative | Reference |  |
| Positive | 2.074 (1.289, 3.337) | 0.003 |
| Unknown | 0.617 (0.290, 1.313) | 0.210 |
| **Perineural invasion** |  |  |
| No | Reference |  |
| Yes | 1.620 (0.936, 2.805) | 0.085 |
| Unknown | 1.010 (0.576, 1.771) | 0.972 |
| **Liver metastasis** |  |  |
| No | Reference |  |
| Yes | 0.807 (0.348, 1.869) | 0.617 |
| Unknown | 10.423 (0.239, 454.462) | 0.224 |
| **Lung metastasis** |  |  |
| No | Reference |  |
| Yes | 1.758 (0.380, 8.128) | 0.470 |
| Unknown | 0.510 (0.012, 22.120) | 0.726 |

**Abbreviations:** MACSS, mucinous adenocarcinoma cancer cause-specific survival; ST, survival time; RT, radiotherapy; HR, hazard radio; CI, confidence interval.

**Table S2** Univariate Cox regression analysis of the prognosis factors associated with OS and CSS in patients with ST<5Y

| **Parameters** | **MACOS** | |  | **MACSS** | |  | **SRCCOS** | |  | **SRCCSS** | |
| --- | --- | --- | --- | --- | --- | --- | --- | --- | --- | --- | --- |
| **HR (95% CI)** | **P value** |  | **HR (95% CI)** | **P value** |  | **HR (95% CI)** | **P value** |  | **HR (95% CI)** | **P value** |
| **Age** | 1.003 (1.002, 1.004) | <0.001 |  | 0.993 (0.991, 0.994) | <0.001 |  | 1.007 (1.005, 1.010) | <0.001 |  | 1.003 (1.000, 1.005) | 0.050 |
| **Sex** |  |  |  |  |  |  |  |  |  |  |  |
| Male | Reference |  |  | Reference |  |  | Reference |  |  | Reference |  |
| Female | 1.036 (0.996, 1.078) | 0.077 |  | 0.987 (0.944, 1.033) | 0.577 |  | 0.983 (0.903, 1.070) | 0.687 |  | 0.954 (0.872, 1.044) | 0.308 |
| **Race** |  |  |  |  |  |  |  |  |  |  |  |
| White | Reference |  |  | Reference |  |  | Reference |  |  | Reference |  |
| Black | 1.023 (0.963, 1.086) | 0.461 |  | 1.115 (1.044, 1.191) | 0.001 |  | 1.062 (0.927, 1.216) | 0.385 |  | 1.076 (0.933, 1.241) | 0.315 |
| Others | 1.047 (0.96, 1.134) | 0.264 |  | 1.183 (1.085, 1.290) | <0.001 |  | 0.929 (0.801, 1.078) | 0.330 |  | 1.001 (0.859, 1.166) | 0.994 |
| **Marital status** |  |  |  |  |  |  |  |  |  |  |  |
| Unmarried | Reference |  |  | Reference |  |  | Reference |  |  | Reference |  |
| Married | 0.919 (0.883, 0.957) | <0.001 |  | 0.989 (0.945, 1.035) | 0.628 |  | 0.892 (0.818, 0.973) | 0.010 |  | 0.915 (0.835, 1.003) | 0.057 |
| Unknown | 1.014 (0.914, 1.125) | 0.789 |  | 1.008 (0.894, 1.136) | 0.897 |  | 0.928 (0.743, 1.158) | 0.508 |  | 0.949 (0.750, 1.200) | 0.659 |
| **Tumor location** |  |  |  |  |  |  |  |  |  |  |  |
| Right colon | Reference |  |  | Reference |  |  | Reference |  |  | Reference |  |
| Left colon | 1.006 (0.961, 1.052) | 0.801 |  | 1.116 (1.061, 1.175) | <0.001 |  | 1.063 (0.962, 1.176) | 0.232 |  | 1.115 (1.003, 1.240) | 0.043 |
| Rectum | 0.943 (0.889, 1.000) | 0.049 |  | 1.113 (1.044, 1.187) | 0.001 |  | 1.077 (0.965, 1.203) | 0.185 |  | 1.143 (1.018, 1.283) | 0.024 |
| **Tumor size** |  |  |  |  |  |  |  |  |  |  |  |
| <50mm | Reference |  |  | Reference |  |  | Reference |  |  | Reference |  |
| ≥50mm | 1.208 (1.155, 1.263) | <0.001 |  | 1.344 (1.276, 1.416) | <0.001 |  | 1.268 (1.144, 1.407) | <0.001 |  | 1.302 (1.165, 1.455) | <0.001 |
| Unknown | 1.677 (1.572, 1.788) | <0.001 |  | 2.054 (1.913, 2.206) | <0.001 |  | 1.819 (1.614, 2.049) | <0.001 |  | 1.958 (1.726, 2.220) | <0.001 |
| **Grade*** |  |  |  |  |  |  |  |  |  |  |  |
| I/II | Reference |  |  | Reference |  |  | Reference |  |  | Reference |  |
| III/IV | 1.229 (1.173, 1.288) | <0.001 |  | 1.365 (1.296, 1.439) | <0.001 |  | 1.317 (1.072, 1.616) | 0.009 |  | 1.377 (1.102, 1.720) | 0.005 |
| Unknown | 1.559 (1.469, 1.654) | <0.001 |  | 1.840 (1.725, 1.962) | <0.001 |  | 1.697 (1.355, 2.125) | <0.001 |  | 1.829 (1.435, 2.331) | <0.001 |
| **Stage** |  |  |  |  |  |  |  |  |  |  |  |
| 0/I | Reference |  |  | Reference |  |  | Reference |  |  | Reference |  |
| II | 1.041 (0.949, 1.141) | 0.394 |  | 1.580 (1.358, 1.838) | <0.001 |  | 1.038 (0.750, 1.435) | 0.823 |  | 0.969 (0.661, 1.420) | 0.870 |
| III | 1.238 (1.133, 1.354) | <0.001 |  | 2.829 (2.448, 3.269) | <0.001 |  | 1.215 (0.907, 1.627) | 0.191 |  | 1.432 (1.019, 2.012) | 0.039 |
| IV | 1.952 (1.787, 2.132) | <0.001 |  | 5.305 (4.597, 6.122) | <0.001 |  | 1.896 (1.417, 2.536) | <0.001 |  | 2.465 (1.757, 3.458) | <0.001 |
| Unknown | 1.977 (1.707, 2.288) | <0.001 |  | 4.403 (3.622, 5.353) | <0.001 |  | 1.972 (1.385, 2.808) | <0.001 |  | 2.132 (1.417, 3.207) | <0.001 |
| **T stage** |  |  |  |  |  |  |  |  |  |  |  |
| T0/Tis/T1 | Reference |  |  | Reference |  |  | Reference |  |  | Reference |  |
| T2 | 0.777 (0.682, 0.885) | <0.001 |  | 0.485 (0.406, 0.580) | <0.001 |  | 0.436 (0.292, 0.651) | <0.001 |  | 0.330 (0.204, 0.536) | 0.000 |
| T3 | 0.899 (0.809, 0.998) | 0.047 |  | 0.969 (0.852, 1.102) | 0.631 |  | 0.725 (0.592, 0.888) | 0.002 |  | 0.716 (0.576, 0.890) | 0.003 |
| T4 | 1.175 (1.056, 1.308) | 0.003 |  | 1.548 (1.360, 1.762) | <0.001 |  | 0.879 (0.720, 1.074) | 0.207 |  | 0.928 (0.750, 1.149) | 0.496 |
| Unknown | 1.931 (1.705, 2.188) | <0.001 |  | 2.607 (2.254, 3.016) | <0.001 |  | 1.324 (1.061, 1.652) | 0.013 |  | 1.411 (1.115, 1.785) | 0.004 |
| **N stage** |  |  |  |  |  |  |  |  |  |  |  |
| N0 | Reference |  |  | Reference |  |  | Reference |  |  | Reference |  |
| N1 | 1.130 (1.074, 1.188) | <0.001 |  | 1.570 (1.479, 1.667) | <0.001 |  | 0.899 (0.789, 1.026) | 0.115 |  | 0.960 (0.832, 1.107) | 0.572 |
| N2 | 1.342 (1.278, 1.409) | <0.001 |  | 2.022 (1.910, 2.141) | <0.001 |  | 1.041 (0.931, 1.163) | 0.484 |  | 1.156 (1.024, 1.304) | 0.019 |
| Unknown | 2.273 (2.069, 2.496) | <0.001 |  | 3.413 (3.084, 3.777) | <0.001 |  | 1.676 (1.422, 1.976) | <0.001 |  | 1.873 (1.573, 2.230) | <0.001 |
| **Metastasis** |  |  |  |  |  |  |  |  |  |  |  |
| M0 | Reference |  |  | Reference |  |  | Reference |  |  | Reference |  |
| M1 | 1.695 (1.626, 1.767) | <0.001 |  | 2.423 (2.314, 2.537) | <0.001 |  | 1.577 (1.446, 1.719) | <0.001 |  | 1.817 (1.658, 1.991) | <0.001 |
| Unknown | 1.461 (1.233, 1.732) | <0.001 |  | 1.667 (1.372, 2.026) | <0.001 |  | 1.705 (1.164, 2.498) | 0.006 |  | 1.798 (1.182, 2.735) | 0.006 |
| **Pretreatment CEA level** | |  |  |  |  |  |  |  |  |  |  |
| Negative/Borderline | Reference |  |  | Reference |  |  | Reference |  |  | Reference |  |
| Positive | 1.357 (1.287, 1.432) | <0.001 |  | 1.584 (1.490, 1.685) | <0.001 |  | 1.392 (1.252, 1.548) | <0.001 |  | 1.368 (1.224, 1.529) | <0.001 |
| Unknown | 1.137 (1.077, 1.200) | <0.001 |  | 1.162 (1.091, 1.238) | <0.001 |  | 1.150 (1.027, 1.287) | 0.015 |  | 1.090 (0.968, 1.228) | 0.156 |
| **Surgery of primary site** | |  |  |  |  |  |  |  |  |  |  |
| No | Reference |  |  | Reference |  |  | Reference |  |  | Reference |  |
| Yes | 0.473 (0.446, 0.501) | <0.001 |  | 0.397 (0.373, 0.422) | <0.001 |  | 0.546 (0.496, 0.601) | <0.001 |  | 0.518 (0.469, 0.573) | <0.001 |
| **Dissection of regional lymph nodes** | |  |  |  |  |  |  |  |  |  |  |
| None or biopsy | Reference |  |  | Reference |  |  | Reference |  |  | Reference |  |
| Yes | 0.567 (0.538, 0.598) | <0.001 |  | 0.490 (0.463, 0.518) | <0.001 |  | 0.593 (0.541, 0.651) | <0.001 |  | 0.566 (0.514, 0.624) | <0.001 |
| Unknown | 0.715 (0.504, 1.014) | 0.060 |  | 0.737 (0.510, 1.064) | 0.104 |  | 1.032 (0.654, 1.629) | 0.891 |  | 0.936 (0.570, 1.538) | 0.794 |
| **Radiotherapy** |  |  |  |  |  |  |  |  |  |  |  |
| None | Reference |  |  | Reference |  |  | Reference |  |  | Reference |  |
| Preoperative RT | 0.712 (0.653, 0.776) | <0.001 |  | 0.846 (0.772, 0.927) | <0.001 |  | 0.661 (0.555, 0.787) | <0.001 |  | 0.691 (0.576, 0.828) | <0.001 |
| Postoperative RT | 0.783 (0.712, 0.861) | <0.001 |  | 0.925 (0.836, 1.023) | 0.127 |  | 0.731 (0.598, 0.895) | 0.002 |  | 0.775 (0.630, 0.955) | 0.016 |
| Others | 0.800 (0.593, 1.080) | 0.145 |  | 0.943 (0.688, 1.292) | 0.714 |  | 0.655 (0.340, 1.261) | 0.206 |  | 0.727 (0.377, 1.399) | 0.340 |
| **Chemotherapy** |  |  |  |  |  |  |  |  |  |  |  |
| No/Unknown | Reference |  |  | Reference |  |  | Reference |  |  | Reference |  |
| Yes | 0.890 (0.855, 0.926) | <0.001 |  | 1.263 (1.206, 1.322) | <0.001 |  | 0.690 (0.632, 0.753) | <0.001 |  | 0.791 (0.720, 0.869) | <0.001 |
| **Systemic therapy** |  |  |  |  |  |  |  |  |  |  |  |
| No | Reference |  |  | Reference |  |  | Reference |  |  | Reference |  |
| Yes | 0.754 (0.720, 0.790) | <0.001 |  | 1.000 (0.949, 1.053) | 0.990 |  | 0.582 (0.529, 0.641) | <0.001 |  | 0.637 (0.576, 0.705) | 0.000 |
| Unknown | 0.813 (0.774, 0.854) | <0.001 |  | 0.909 (0.858, 0.963) | 0.001 |  | 0.680 (0.608, 0.761) | <0.001 |  | 0.707 (0.627, 0.797) | 0.000 |

**Notes:** *Grade I well differentiated, Grade II moderately differentiated, Grade III poorly differentiated, Grade IV undifferentiated.

**Abbreviations:** MAOS, overall survival of mucinous adenocarcinoma; MACSS, mucinous adenocarcinoma cancer cause-specific survival; SRCCOS, overall survival of signet ring cell carcinoma; SRCCSS, signet ring cell carcinoma cancer cause-specific survival; ST, survival time; RT, radiotherapy; HR, hazard radio; CI, confidence interval.
